# Supplementary material for: Capturing hepatocellular carcinoma cells using lactobionic acid-functionalized electrospun polyvinyl alcohol/polyethyleneimine nanofibers
Source: Royal Society of Chemistry journal article supplement (doi:10.1039/c5ra11662g), 2015-01-01
Supplement: c5ra11662g1.pdf [file c5ra11662g1.pdf]

## Electronic Supplementary Information

### **Capturing hepatocellular carcinoma cells using lactobionic acid-functionalized electrospun polyvinyl alcohol/polyethyleneimine nanofibers†**

Yili Zhao,<sup>a</sup> Zhangyu Fan,<sup>b</sup> Mingwu Shen,<sup>b</sup> Xiangyang Shi<sup>\*a, b</sup>

<sup>a</sup> Key Laboratory of Textile Science & Technology, Ministry of Education, College of Textiles, Donghua University, Shanghai 201620, People's Republic of China

<sup>b</sup> College of Chemistry, Chemical Engineering and Biotechnology, Donghua University, Shanghai 201620, People's Republic of China

---

\* Corresponding author. Tel: +86 21 67792656; fax: +86 21 67792306 804.

E-mail: xshi@dhu.edu.cn

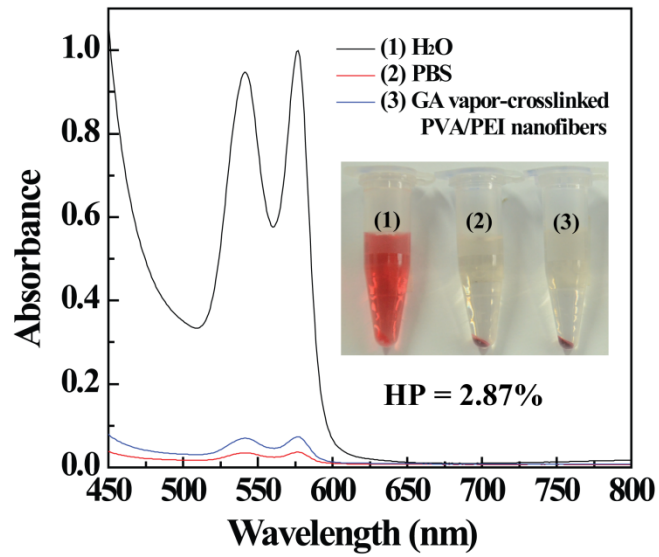

**Figure S1.** UV-vis spectra of the HRBC suspensions treated with H<sub>2</sub>O, PBS, and unmodified crosslinked PVA/PEI nanofibers at the concentration of 2 mg/mL for 2 h. The inset shows a photograph of HRBCs exposed to water, PBS, and unmodified crosslinked PVA/PEI nanofibers at the concentration of 2 mg/mL, followed by centrifugation.

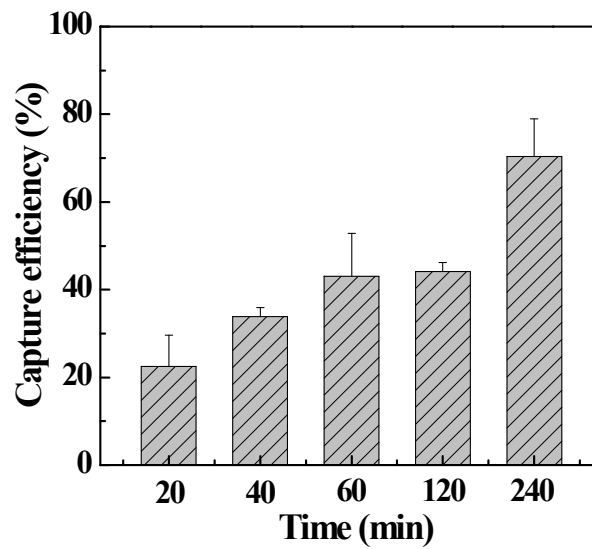

**Figure S2.** The efficiency of the unmodified crosslinked PVA/PEI nanofibers to capture HepG2 cells at different time points.
